# Supplementary material for: Algal photosystem I dimer and high-resolution model of PSI-plastocyanin complex
Source: PubMed Central journal article supplement (PMC9579051; doi:10.1038/s41477-022-01253-4), 2022-10-13
Supplement: 41477_2022_1253_MOESM4_ESM.pdf [file 41477_2022_1253_MOESM4_ESM.pdf]

**Supplementary Table 1. Chemical moieties involved in coordination of chlorophyll *a/b*.**

|                     | Chlorophyll <i>a/b</i> |     |                     |                     |     |           |       |     |     |     |        |
|---------------------|------------------------|-----|---------------------|---------------------|-----|-----------|-------|-----|-----|-----|--------|
|                     | His                    | Met | 1x H <sub>2</sub> O | 2x H <sub>2</sub> O | Gln | back-bone | Lipid | Asp | Glu | Asn | Total  |
| <b>All subunits</b> | 84                     | 2   | 13/1                | 22/19               | 13  | 11/7      | 10    | 5/3 | 28  | 11  | 199/30 |
| <b>PsaA</b>         | 32                     | 1   | 3                   | 4                   | 3   | 1         | 1     |     |     |     | 45     |
| <b>PsaB</b>         | 31                     | 1   | 5                   |                     | 1   |           | 1     | 1   |     |     | 40     |
| <b>PsaF</b>         |                        |     |                     | 2                   |     |           |       | 1   |     |     | 3      |
| <b>PsaG</b>         | 1                      |     |                     |                     |     |           |       | 1   |     |     | 2      |
| <b>PsaJ</b>         |                        |     |                     |                     |     |           |       |     | 1   |     | 1      |
| <b>PsaK</b>         | 1                      |     |                     | 1                   |     | 1         |       | 1   |     |     | 4      |
| <b>PsaL</b>         | 1                      |     | 1                   |                     |     |           |       |     |     |     | 2      |
| <b>Lhca1_a</b>      | 2                      |     |                     | 3/2                 |     | 1/1       | 1     |     | 3   | 1   | 11/3   |
| <b>Lhca1_b</b>      | 2                      |     | 1/1                 | 2/1                 |     | 1/1       | 1     |     | 3   | 1   | 11/3   |
| <b>Lhca3</b>        | 2                      |     | 1                   | 2/1                 | 2   | 2         |       |     | 3   | 1   | 13/1   |
| <b>Lhca4</b>        | 1                      |     |                     | 1/3                 | 1   | 0/1       | 1     | 1/1 | 3   | 2   | 10/5   |
| <b>Lhca5</b>        | 3                      |     |                     | 2/3                 | 1   | 2         | 1     | 0/1 | 3   | 1   | 13/4   |
| <b>Lhca6</b>        | 3                      |     | 1                   | 1/3                 | 1   | 0/2       | 1     | 0/1 | 3   | 1   | 11/6   |
| <b>Lhca7</b>        | 2                      |     | 1                   | 2/2                 | 1   | 1/1       | 1     |     | 3   | 1   | 12/3   |
| <b>Lhca8</b>        | 2                      |     |                     | 2/2                 | 1   | 1/1       | 1     |     | 3   | 1   | 11/3   |
| <b>Lhca9</b>        | 1                      |     |                     | 0/2                 | 2   | 1         | 1     |     | 3   | 2   | 10/2   |
